# Supplementary material for: Highly active and stable Zn/ZSM-5 zeolite catalyst for the conversion of methanol to aromatics: effect of support morphology
Source: Royal Society of Chemistry journal article supplement (doi:10.1039/c8cy01734d), 2018-01-01
Supplement: c8cy01734d1.pdf [file c8cy01734d1.pdf]

Electronic Supplementary Information (ESI)

## Supporting Information For

### Highly Active and Stable Zn/ZSM-5 Zeolite Catalyst for the Conversion of Methanol to Aromatics: Effect of Supports Morphology

Kai Wang,<sup>a,b,c</sup> Mei Dong,<sup>b,\*</sup> Xianjun Niu,<sup>b,c</sup> Junfen Li,<sup>b</sup> Zhangfeng Qin,<sup>b</sup> Weibin Fan,<sup>b</sup>  
Jianguo Wang,<sup>b,\*</sup>

<sup>a</sup>*College of Chemical and Environmental Engineering, Anyang Institute of Technology, Anyang 455000, PR China*

<sup>b</sup>*State Key Laboratory of Coal Conversion, Institute of Coal Chemistry, Chinese Academy of Sciences, 27 South Taoyuan Road, Taiyuan, Shanxi 030001, PR China.*

<sup>c</sup>*University of Chinese Academy of Sciences, Beijing 100049, PR China.*

*E-mail: mdong@sxicc.ac.cn (M. Dong); iccjpgw@sxicc.ac.cn (J. Wang).*

---

As the **Supporting Information** of the manuscript “Highly Active and Stable Zn/HZSM-5 Zeolite Catalyst for the Conversion of Methanol to Aromatics: Effect of Supports Morphology”, following materials are provided:

**Table of contents**

- (1) The molar composition of ZSM-5 zeolite supports and Si/Al ratios of obtained products.
- (2) Reduction rate of catalyst lifetime with the loading of Zn species, as comparing with the support.
- (3) SEM image (a) and TEM image (b) of Sphere-ZSM-5: (a) overview, and (b) individual crystal; TEM images of Hollow-ZSM-5: (c) overview, (d) fringe in shell.
- (4) (I) Nitrogen adsorption/desorption isotherms and (II) pore size distribution of HZSM-5 and Zn-based HZSM-5 zeolites: (a) Hollow-ZSM-5; (b) Hollow-IM; (c) Sphere-ZSM-5; (d) Sphere-IM; (e) Rod-ZSM-5; (f) Rod-IM; (g) Coffin-ZSM-5; and (h) Coffin-IM.
- (5)  $^{27}\text{Al}$  MAS NMR spectra of ZSM-5 samples: (a) Hollow-ZSM-5, (b) Sphere-ZSM-5, (c) Rod-ZSM-5 (21), and (d) Coffin-ZSM-5.
- (6) Correlation between the medium acid sites and the increase of Lewis sites.
- (7) SEM images of (a) pure ZnO, (b) ZnO macro-particles and (c) ZnO nano-particles in Sphere-IM. (The inset in (b) was the HRTEM image of ZnO macro-particles)
- (8) The variation of carbon mass balances with the time on stream over different catalysts.
- (9) TG curves of Zn/ZSM-5 catalysts with different morphologies: (a) Coffin-IM, (b) Rod-IM, (c) Sphere-IM, and (d) Hollow-IM.

Table S1. The molar composition of ZSM-5 zeolite supports and Si/Al ratios of obtained products.

| Samples                   | The molar composition                                                                                                                   | Si/Al <sup>c</sup> |
|---------------------------|-----------------------------------------------------------------------------------------------------------------------------------------|--------------------|
| Rod-ZSM-5 <sup>a</sup>    | SiO <sub>2</sub> : 0.014 Al <sub>2</sub> O <sub>3</sub> : 0.05Na <sub>2</sub> O: 31H <sub>2</sub> O: 0.15NBA: 0Na <sub>2</sub> -EDTA    | 31.2               |
| Coffin-ZSM-5 <sup>b</sup> | SiO <sub>2</sub> : 0.014 Al <sub>2</sub> O <sub>3</sub> : 0.09Na <sub>2</sub> O: 31H <sub>2</sub> O: 0.03NBA: 0Na <sub>2</sub> -EDTA    | 33.7               |
| Sphere-ZSM-5 <sup>b</sup> | SiO <sub>2</sub> : 0.014 Al <sub>2</sub> O <sub>3</sub> : 0Na <sub>2</sub> O: 31H <sub>2</sub> O: 0.15TPAOH: 0Na <sub>2</sub> -EDTA     | 32.4               |
| Hollow-ZSM-5 <sup>a</sup> | SiO <sub>2</sub> : 0.014 Al <sub>2</sub> O <sub>3</sub> : 0.09Na <sub>2</sub> O: 31H <sub>2</sub> O: 0.15NBA: 0.08Na <sub>2</sub> -EDTA | 31.5               |

a: Without the addition of 1 wt.% silicalite-1 seeds into synthesis gel;

b: With the addition of 1 wt.% silicalite-1 seeds into synthesis gel.

c: Si/Al of obtained products, which was quantified by ICP.

Table S2. Reduction rate of catalyst lifetime with the loading of Zn species, as comparing with the support.

| Samples   | Reduction rate of catalyst life <sup>a</sup> (%) |
|-----------|--------------------------------------------------|
| Rod-IM    | 46.43                                            |
| Coffin-IM | 30.77                                            |
| Sphere-IM | 27.46                                            |
| Hollow-IM | 16.58                                            |

a: Calculated from  $\frac{t_{\text{HZSM-5}} - t_{\text{Zn / HZSM-5}}}{t_{\text{HZSM-5}}} \times 100\%$ .

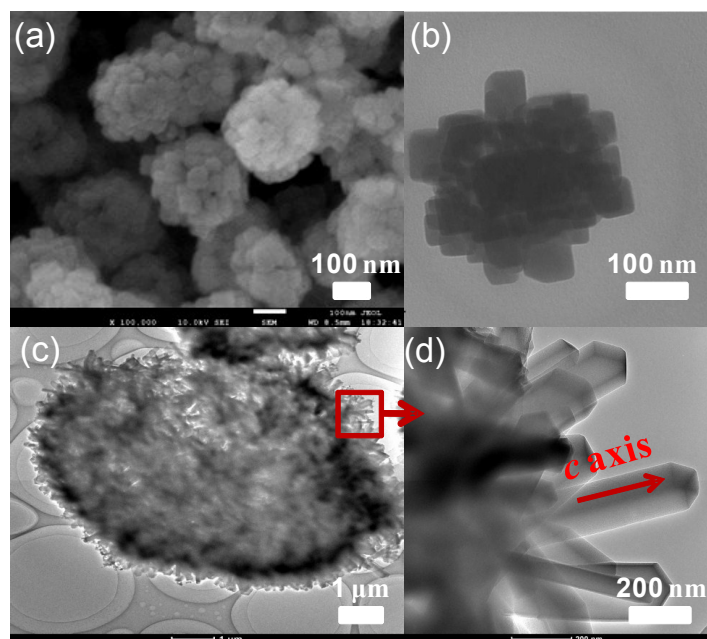

Figure S1. SEM image (a) and TEM image (b) of Sphere-ZSM-5: (a) overview, and (b) individual crystal; TEM images of Hollow-ZSM-5: (c) overview, (d) fringe in shell.

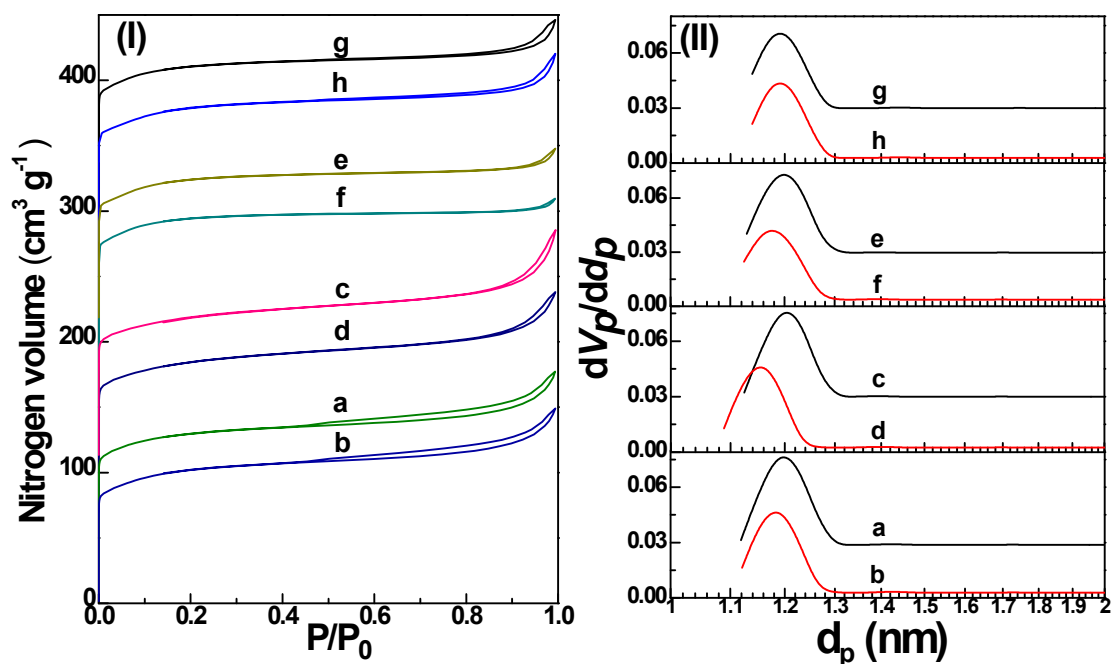

Figure S2. (I) Nitrogen adsorption/desorption isotherms and (II) pore size distribution of HZSM-5 and Zn-based HZSM-5 zeolites: (a) Hollow-ZSM-5; (b) Hollow-IM; (c) Sphere-ZSM-5; (d) Sphere-IM; (e) Rod-ZSM-5; (f) Rod-IM; (g) Coffin-ZSM-5; and (h) Coffin-IM.

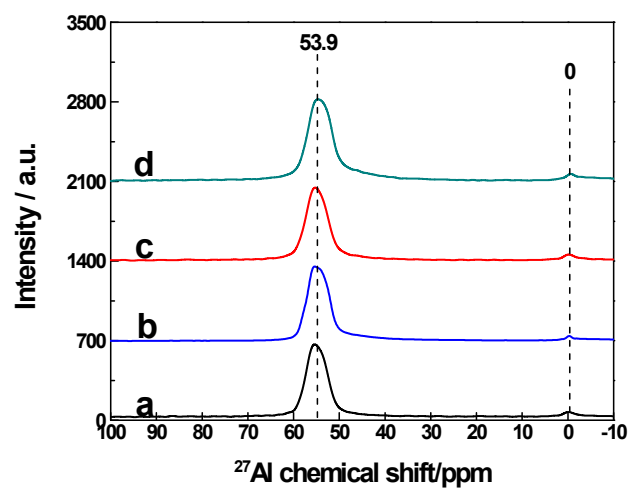

Figure S3.  $^{27}\text{Al}$  MAS NMR spectra of ZSM-5 samples: (a) Hollow-ZSM-5, (b) Sphere-ZSM-5, (c) Rod-ZSM-5 (21), and (d) Coffin-ZSM-5.

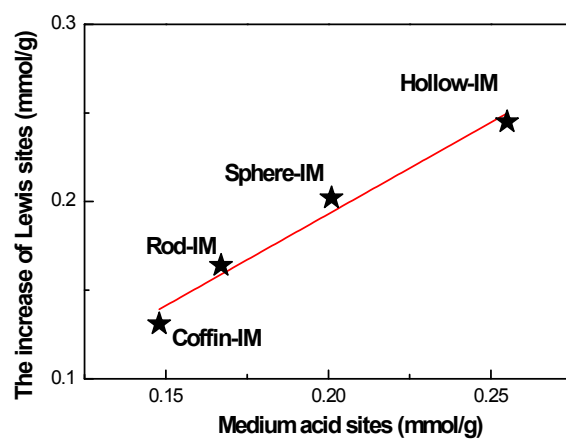

Figure S4. Correlation between the medium acid sites and the increase of Lewis sites.

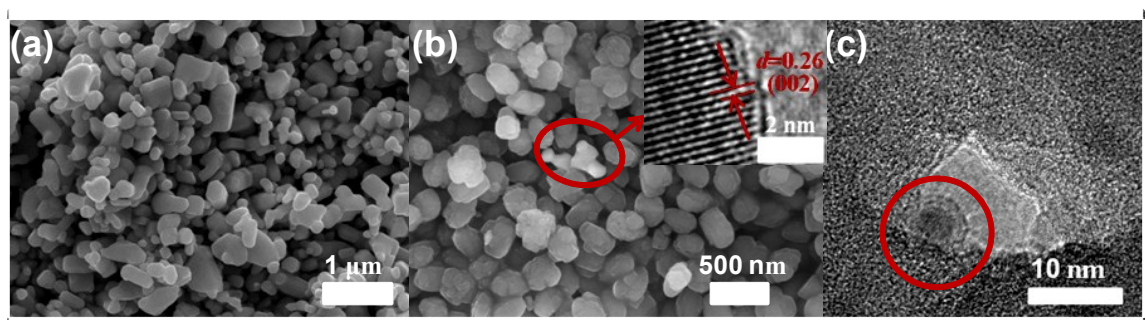

Figure S5. SEM images of (a) pure ZnO, (b) ZnO macro-particles and (c) ZnO nano-particles in Sphere-IM. (The inset in (b) was the HRTEM image of ZnO macro-particles)

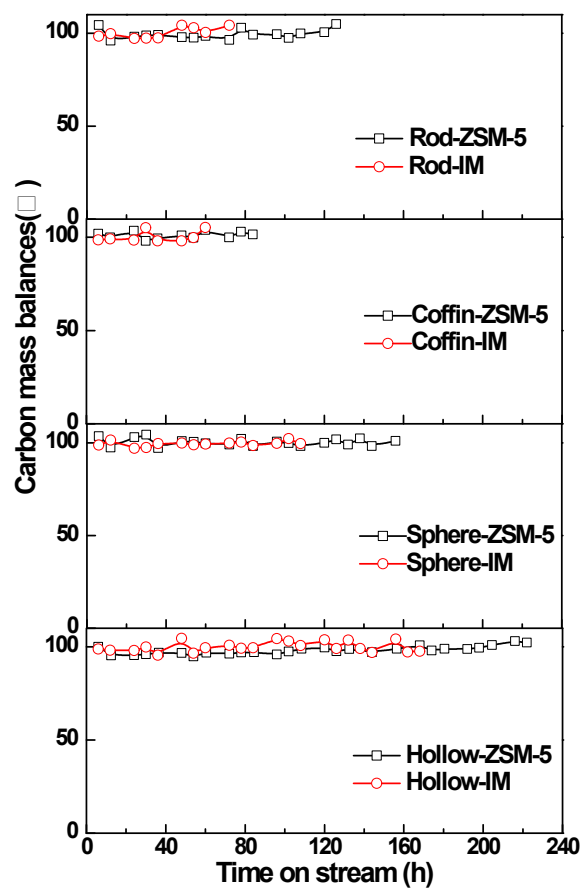

Figure S6. The variation of carbon mass balances with the time on stream over different catalysts.

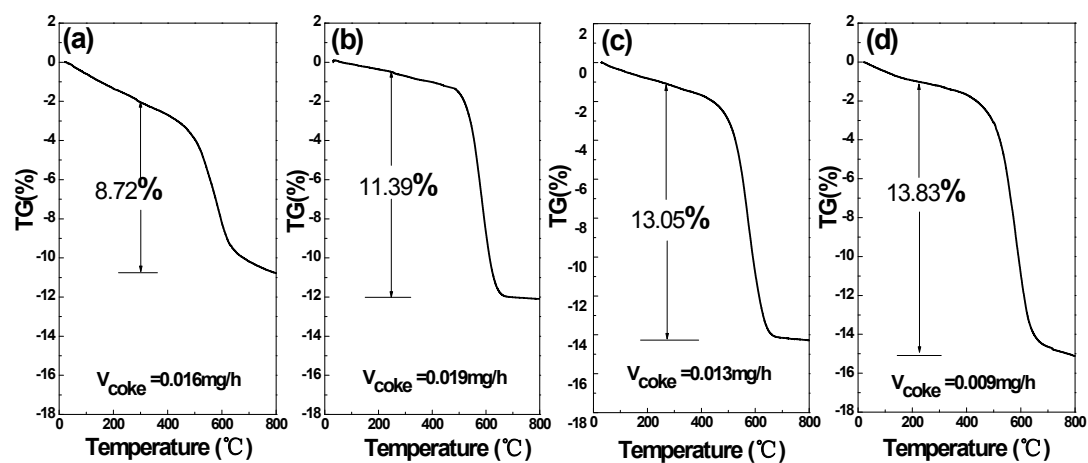

Figure S7. TG curves of four used Zn/ZSM-5 catalysts after MTA process: (a) Coffin-IM, (b) Rod-IM, (c) Sphere-IM, and (d) Hollow-IM.
